# Supplementary material for: Background-filtered telomerase activity assay with cyclic DNA cleavage amplification
Source: Royal Society of Chemistry journal article supplement (doi:10.1039/d3nr04132h), 2023-01-01
Supplement: d3nr04132h1.pdf [file d3nr04132h1.pdf]

## Supporting Information

# Background-filtered telomerase activity assay with cyclic DNA cleavage amplification

*Hyogu Han,<sup>ab</sup> Chihyun Park,<sup>c</sup> Chang Yeol Lee<sup>\*d</sup> and Jun Ki Ahn<sup>\*a</sup>*

<sup>a</sup> Material & Component Convergence R&D Department, Korea Institute of Industrial Technology (KITECH), Ansan, 15588, Korea

<sup>b</sup> Department of Chemistry, Gangneung-Wonju National University, Gangneung, 25457, Korea

<sup>c</sup> Daejeon District Office, National Forensic Service, Daejeon, 34054, Korea

<sup>d</sup> Bionanotechnology Research Center, Korea Research Institute of Bioscience and Biotechnology (KRIBB), Daejeon, 34141, Korea

\*Corresponding author.

Tel.: +82-42-860-4456; Fax: +82-42-861-1759

E-mail address: lcycol8457a@kribb.re.kr (C.Y. Lee).

Tel.: +82-31-8040-6391; Fax: +82-31-8040-6220

E-mail address: jkahn@kitech.re.kr (J.K. Ahn).

**Fig S1.** QUEST reaction at 37 °C. FEN1 was active enough to result in high signal for the pre-concatenated TSP (100 nM) (Signal-to-noise ratio (SNR) = 32.4). Pre-concatenated TSP is TSP appended with telomeres ((TTAGGG)<sub>12</sub>) (Table S2).

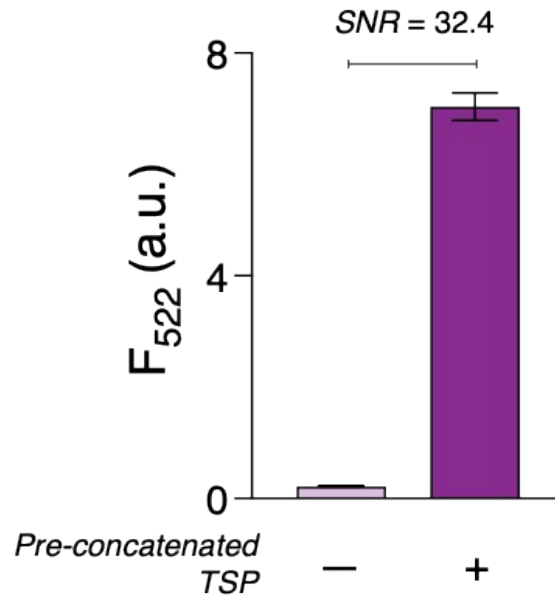

Though FEN1 is known to have the optimal activity at 65 °C, it retained significant activity even at 37 °C as evidenced by high SNR (32.4). This is consistent with the previous literatures.<sup>1-4</sup>

**Fig. S2.** Verification of FEN1-catalyzed cyclic cleavage reaction. (a) Compared to the one-to-one cleavage reaction, where a single cleavage event of RP-Q/F takes place for a single pre-concatenated TSP<sub>mini</sub>, the FEN1-catalyzed cyclic cleavage reaction induces multiple cleavage reactions on RP-Q/F. Intact RP-Q/F displaces the cleaved RP-Q/F to initiate another round of cleavage reaction, thereby switching on a number of fluorophores. (b) Oligonucleotide sequences used in the experimental verification of FEN1-catalyzed cyclic cleavage reaction. (c) The result supported the cyclic cleavage reaction of FEN1. Signals ( $\Delta F$ ) of the FEN1-catalyzed reaction were significantly higher than those of controls in which concentration-matched RP<sub>cut</sub>-F samples were included to assume the one-to-one cleavage reaction (\* $p < 0.005$ ). RP<sub>cut</sub>-F is the expected form of cleaved RP-Q/F.  $\Delta F = F - F_0$ , where  $F_0$  is the fluorescence signal in the absence of pre-concatenated TSP<sub>mini</sub> (in FEN1-catalyzed reaction) or RP<sub>cut</sub>-F (in Control) at 522 nm.

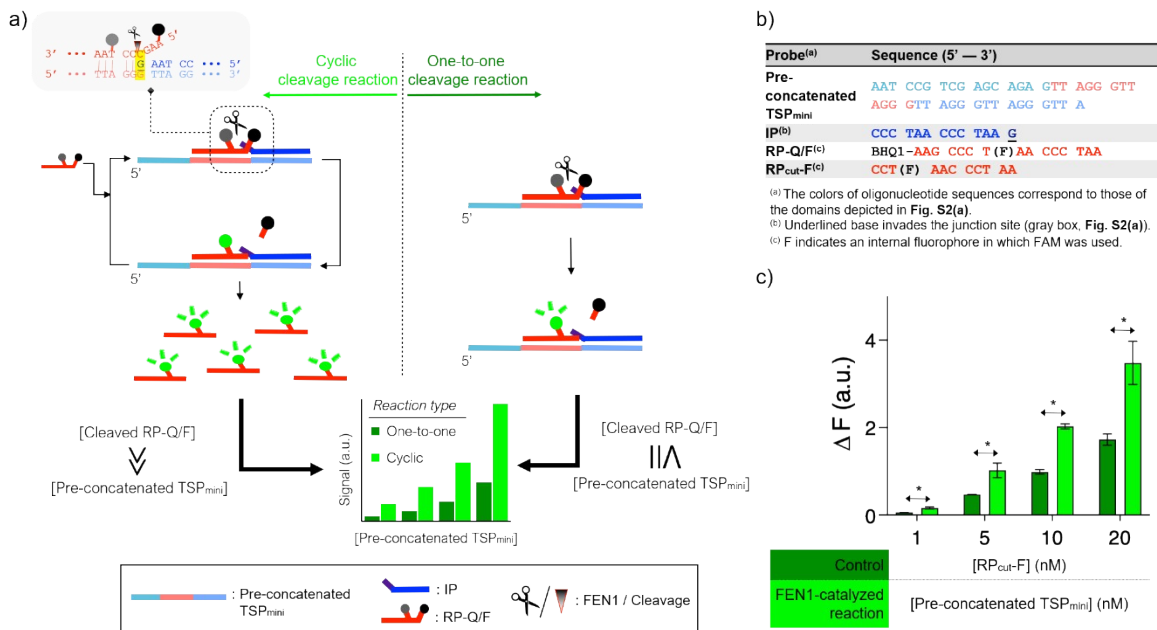

**Fig S3.** Optimization of reaction concentrations. Varying concentrations of key assay components were tested in the absence and presence of HeLa cell extracts ( $10^4$  cells). We compared signal-to-noise ratios (SNRs) and selected optimal concentrations of RP (a), IP (b), FEN1 (c), GO (d), and dNTP (e).

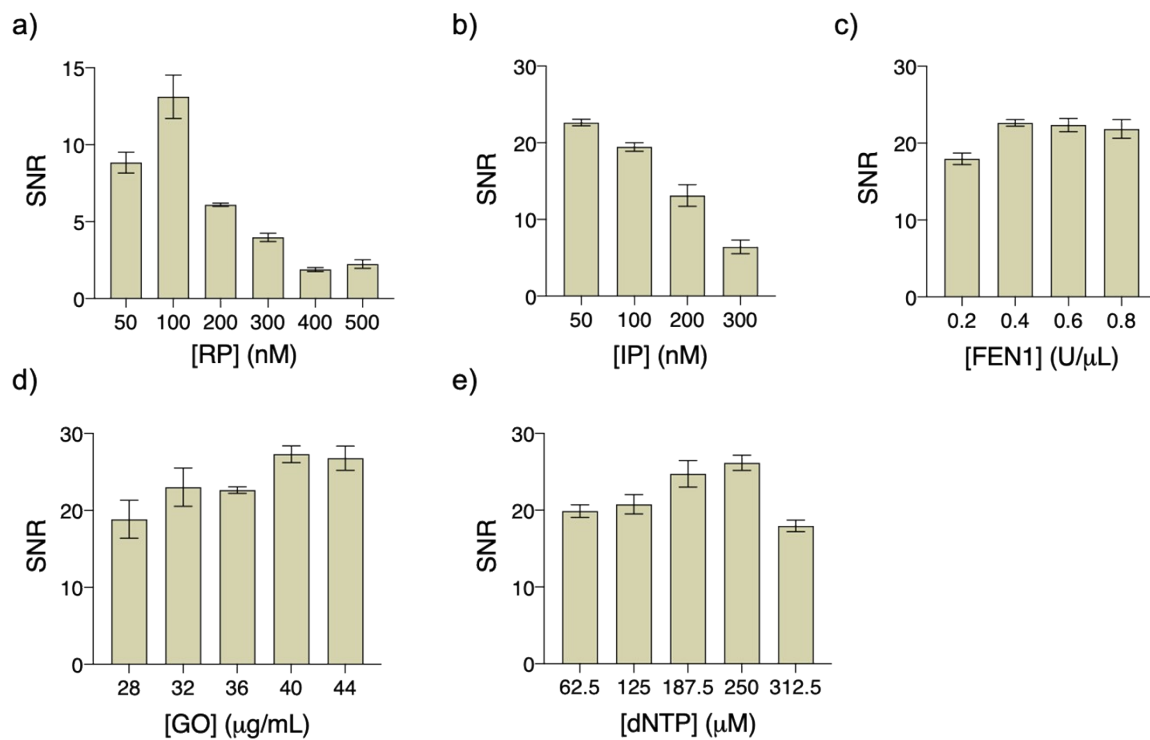

**Fig S4.** Optimization of reaction times. To minimize the assay time, we tested different times in the absence and presence of HeLa cell extracts ( $10^4$  cells). Comparing SNRs, we found optimal times for QUEST reaction (a) and GO-aided BG filtering (b).

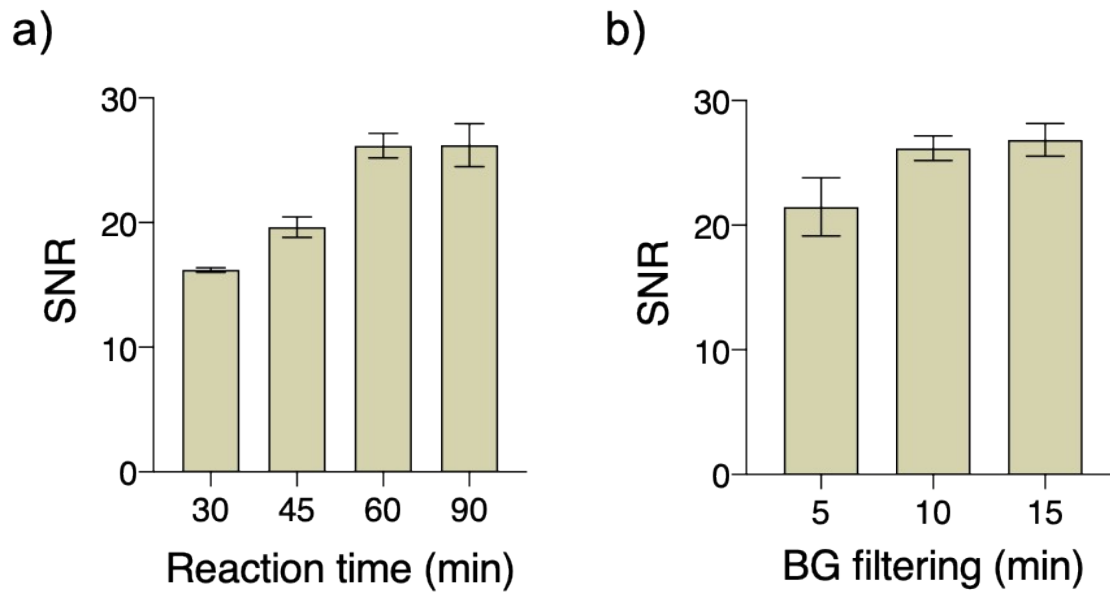

**Fig S5.** TRAP for telomerase activity assay for various cell lines. The telomerase activities in various cell lines were analyzed by TRAP, the standard method for telomerase activity assay. The results matched with those in Fig. 3, supporting the reliability of QUEST. [Cell extract]:  $10^4$  cells. BL: Blank, where cell extract was not added.

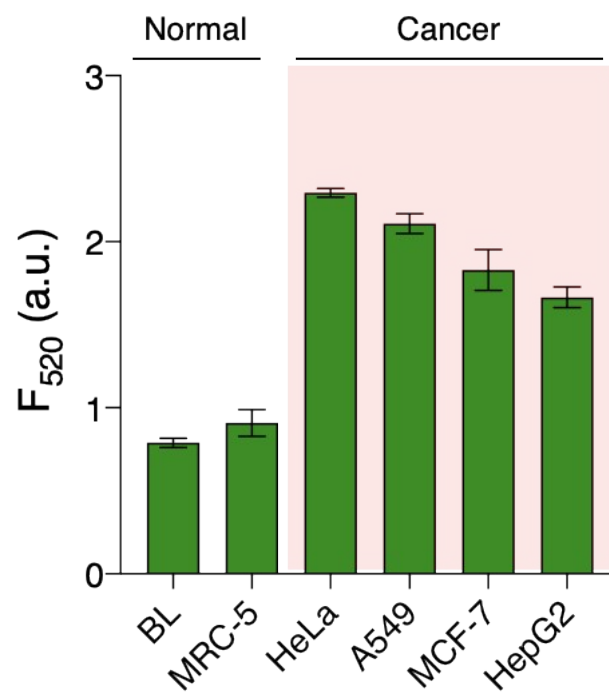

**Fig S6.** Effect of AZT on QUEST reaction. (a) To make sure that AZT does not affect other parts of QUEST from telomerase activity, we investigated the QEUST reaction in the presence of AZT (10 nM). For this, we used the pre-concatenated TSP (100 nM), which is TSP appended with telomeres ((TTAGGG)<sub>12</sub>), while excluding TSP and HeLa cell extract. (b) SNRs were obtained from the results in (a) and normalized to directly elucidate the effect of AZT on QUEST reaction. The effect was negligible as indicated by *p* value higher than 0.05.

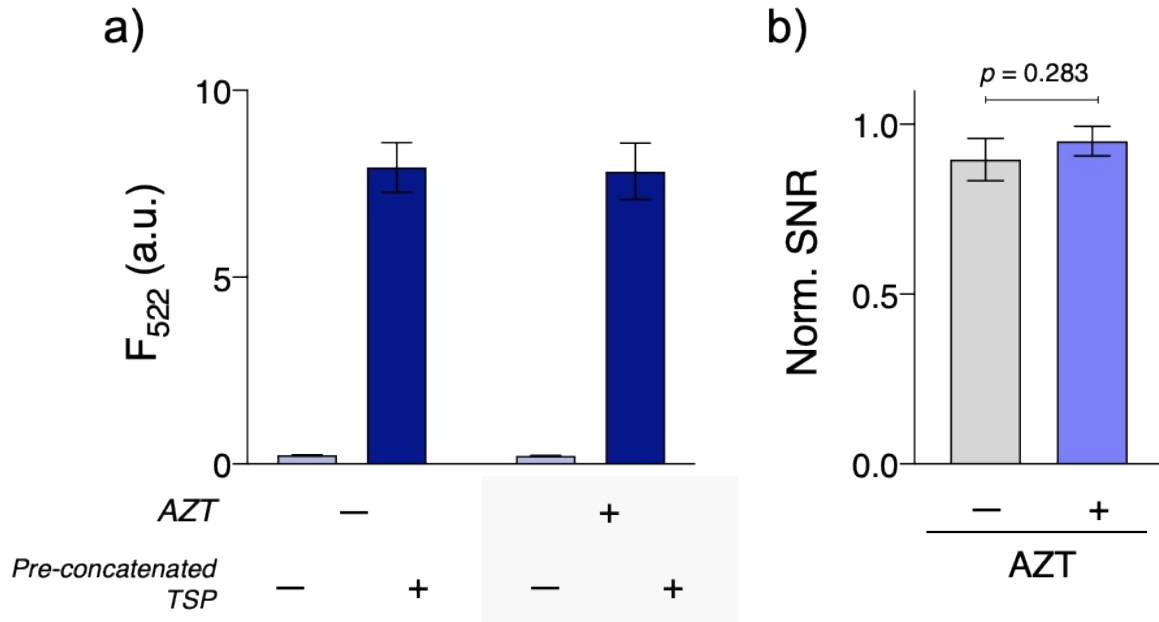

**Fig S7.** GO Characterization. (a) AFM image and (b) topographic profile of GO.

a)

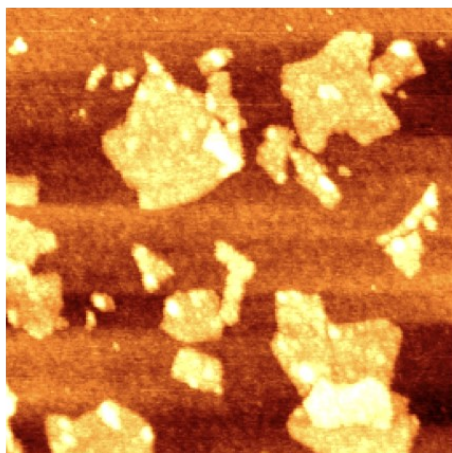

b)

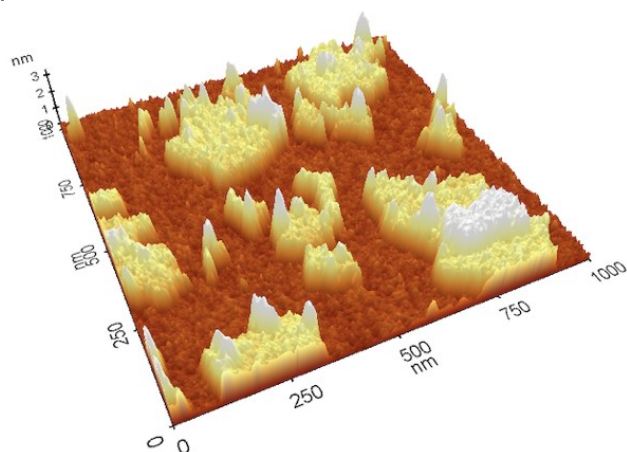



**Table S1.** Comparison with previous telomerase activity assays.

| System                                                             | Mode                                | Time (min) | LOD                      | Cost (\$/assay) | Characteristics                                                                                                                                                                                  | Ref      |
|--------------------------------------------------------------------|-------------------------------------|------------|--------------------------|-----------------|--------------------------------------------------------------------------------------------------------------------------------------------------------------------------------------------------|----------|
| Proximity-induced DNA walker                                       | Electrochemiluminescence            | 160        | 16 cells/mL              | > 8.45          | <ul style="list-style-type: none"> <li>Electrode preparation</li> <li>Nanomaterial preparation and its modification with DNA probes</li> <li>Washing/separation</li> </ul>                       | 5        |
| Catalytic hairpin assembly (CHA) for Au nanorod etching            | Surface plasmon resonance           | 175        | 15 cells                 | 1.97            | <ul style="list-style-type: none"> <li>Preparation of nanomaterial</li> <li>Several steps</li> </ul>                                                                                             | 6        |
| Entropy-driven circuit reaction and CHA for SERS detection         | Surface enhanced Raman spectroscopy | 200        | 1 cell                   | 4.84            | <ul style="list-style-type: none"> <li>Film fabrication</li> <li>Nanomaterial preparation and its modification with DNA probes</li> <li>Several steps accompanying washing/separation</li> </ul> | 7        |
| DNA network formation                                              | Electrochemistry                    | > 190      | 20 cells/mL              | > 60            | <ul style="list-style-type: none"> <li>Electrode preparation and modification with DNA probes</li> <li>Several steps accompanying washing/separation</li> </ul>                                  | 8        |
| Dual-DNA walkers on CHA and DNAzyme                                | Fluorescence                        | 180        | 7 cells/mL               | 1.86            | <ul style="list-style-type: none"> <li>Nanomaterial preparation and its modification with DNA probes</li> </ul>                                                                                  | 9        |
| 3D-bipedal DNA walker                                              | Fluorescence                        | 160        | 5 cells/mL               | 11.0            | <ul style="list-style-type: none"> <li>Nanomaterial preparation and its modification with DNA probes</li> <li>Intracellular imaging</li> </ul>                                                   | 10       |
| Tetrahedral DNA nanoconjugate                                      | Fluorescence                        | 60         | 6 cells                  | N/A             | <ul style="list-style-type: none"> <li>Nanomaterial preparation and its modification with DNA probes</li> <li>Intracellular imaging</li> </ul>                                                   | 11       |
| Molecular machine                                                  | Fluorescence                        | 180        | 510 cells/mL             | 25.8            | <ul style="list-style-type: none"> <li>Extensive labeling with F and Q</li> <li>Ratiometric signaling</li> </ul>                                                                                 | 12       |
| DNA tetrahedron FRET sensor                                        | Fluorescence                        | 60         | 1 cell                   | 303.8           | <ul style="list-style-type: none"> <li>Dual probe labeling with F and Q</li> <li>Intracellular imaging</li> </ul>                                                                                | 13       |
| Strand displacement amplification and rolling circle amplification | Fluorescence                        | 120        | 60 cells/mL              | 3.62            | <ul style="list-style-type: none"> <li>Likelihood of non-specific reactions</li> </ul>                                                                                                           | 14       |
| Stem-loop primer-mediated exponential amplification                | Fluorescence                        | 105        | 10 <sup>3</sup> cells/mL | 1.52            | <ul style="list-style-type: none"> <li>Likelihood of non-specific reactions</li> <li>Complicated DNA probe design</li> </ul>                                                                     | 15       |
| CRISPR/Cas assay for TRAP product                                  | Colorimetry                         | 180        | 1 cell                   | > 2.47          | <ul style="list-style-type: none"> <li>Need of thermocycling and relevant instrument</li> <li>Nanomaterial preparation and its modification with DNA probes</li> </ul>                           | 16       |
| Elongation-triggered CRISPR/Cas reaction                           | Fluorescence                        | 60         | 260 cells/mL             | 11.5            | <ul style="list-style-type: none"> <li>Dual probe labeling with F and Q</li> </ul>                                                                                                               | 17       |
| Lateral flow analysis of CRISPR/Cas reaction                       | Colorimetry                         | > 65       | 10 <sup>4</sup> cells/mL | 4.58            | <ul style="list-style-type: none"> <li>Need of costly, laborious LFA toolkit</li> <li>Subjective, qualitative LFA result</li> <li>Several manual steps</li> </ul>                                | 18       |
| <b>QUEST</b>                                                       | <b>Fluorescence</b>                 | <b>70</b>  | <b>2 cells</b>           | <b>0.73</b>     | <b>-</b>                                                                                                                                                                                         | <b>-</b> |

**(Our work)**

**(36 cells/mL)**

**Table S2.** Oligonucleotide sequences used in this work.

| Purpose                      | Probe <sup>(a)</sup>  | Sequence (5'—3')                        |
|------------------------------|-----------------------|-----------------------------------------|
| QUEST                        | TSP                   | AAT CCG TCG AGC AGA GTT                 |
|                              | RP                    | FAM-AAG CCC TAA CCC TAA                 |
|                              | IP <sup>(b)</sup>     | CCC TAA CCC TAA <u>G</u>                |
| Gel electrophoresis          | RP-Q/F <sup>(c)</sup> | BHQ1-AAG CCC T(F)AA CCC TAA             |
| Effect of inhibitor on QUEST | Pre-concatenated TSP  | AAT CCG TCG AGC AGA GTT AGG GTT AGG GTT |
|                              |                       | AGG GTT AGG GTT AGG GTT AGG GTT AGG GTT |
|                              |                       | AGG GTT AGG GTT AGG GTT AGG GTT AGG G   |

<sup>(a)</sup> The colors of oligonucleotide sequences correspond to those of the domains depicted in Scheme 1.

<sup>(b)</sup> Underlined base invades the junction site (light gray box, **Scheme 1**).

<sup>(c)</sup> F indicates an internal fluorophore in which FAM was used.

## References

- 1 C. Y. Lee, H. Jang, H. Kim, Y. Jung, K. S. Park and H. G. Park, *Microchim. Acta*, 2019, **186**, 1-7.
- 2 S. Chen, Z. Xie, W. Zhang, S. Zhao, Z. Zhao, X. Wang, Y. Huang and G. Yi, *Anal. Chim. Acta*, 2023, **1238**, 340653.
- 3 J. Park, J. Kim, C. Park, J. W. Lim, M. Yeom, D. Song, E. Kim and S. Haam, *Analyst*, 2022, **147**, 5028–5037.
- 4 S. Ding, Y. Wei, G. Chen, F. Du, X. Cui, X. Huang, Y. Yuan, J. Dong and Z. Tang, *Anal. Chem.*, 2022, **94**, 13549–13555.
- 5 Y. Guo, S. Liu, H. Yang, P. Wang and Q. Feng, *Anal. Chim. Acta*, 2021, **1144**, 68–75.
- 6 D. Wang, R. Guo, Y. Wei, Y. Zhang, X. Zhao and Z. Xu, *Biosens. Bioelectron.*, 2018, **122**, 247–253.
- 7 Y. Li, H. Han, Y. Wu, C. Yu, C. Ren and X. Zhang, *Biosens. Bioelectron.*, 2019, **142**, 111543.
- 8 L. Liu, D. Wu, S. Zhen, K. Lu, X. Yi and Z. Sun, *Sens. Actuators B: Chem.*, 2021, **334**, 129659.
- 9 Y. Shen, J. Gong, S. Li, C. Liu, L. Zhou, J. Sheng and X. Qingxia, *Sens. Actuators B: Chem.*, 2021, **329**, 129078.
- 10 F. Meng, H. Chai, X. Ma, Y. Tang and P. Miao, *J. Mater. Chem. B*, 2019, **7**, 1926–1932.
- 11 X. Liu, F. Meng, R. Sun, K. Wang, Z. Yu and P. Miao, *Chem. Commun.*, 2021, **57**, 2629–2632.
- 12 C. He, Z. Liu, Q. Wu, J. Zhao, R. Liu, B. Liu and T. Zhao, *ACS Sensors*, 2018, **3**, 757–762.
- 13 C. Jiang, F. Meng, D. Mao, Y. Tang and P. Miao, *ChemBioChem*, 2021, **22**, 1302–1306.
- 14 F. Ma, S. H. Wei, J. Leng, B. Tang and C. Y. Zhang, *Chem. Commun.*, 2018, **54**, 2483–2486.
- 15 H. Wang, H. Wang, C. Liu, X. Duan and Z. Li, *Chem. Sci.*, 2016, **7**, 4945–4950.
- 16 M. Cheng, E. Xiong, T. Tian, D. Zhu, H. qiang Ju and X. Zhou, *Biosens. Bioelectron.*, 2021, **172**, 112749.
- 17 P. Yu, T. Yang, D. Zhang, L. Xu, X. Cheng, S. Ding and W. Cheng, *Anal. Chim. Acta*, 2021, **1159**, 338404.
- 18 X. Chen, Y. Deng, G. Cao, X. Liu, T. Gu, R. Feng, D. Huo, F. Xu and C. Hou, *Anal. Chim. Acta*, 2021, **1146**, 61–69.
